# Supplementary material
Source: publisher figshare collection journal article supplement (https://gsajournals.figshare.com/ndownloader/files/23153591)
Supplement: Supplementary file 1 [file 23153591]

## Sheet: Sheet1
Table S2: H3K27me2/3 domains determined with HOMER for wild type
Contig	Start position	End position	Size (bp)	Peak Score	Fold Change vs Control
CM002236.1	38	3306	3268	330	14.92
CM002236.1	4183	8961	4778	108	12.24
CM002236.1	11211	16672	5461	111.5	12.44
CM002236.1	17249	22281	5032	222	5.26
CM002236.1	33413	48194	14781	209	11.71
CM002236.1	48968	51475	2507	163	5.16
CM002236.1	57679	60775	3096	133	6.04
CM002236.1	61668	63225	1557	146.5	6.25
CM002236.1	89204	95172	5968	194.5	10.28
CM002236.1	95680	96434	754	159	4.04
CM002236.1	134550	136009	1459	219	4.67
CM002236.1	180809	200214	19405	134	10.75
CM002236.1	207857	225034	17177	260	15.53
CM002236.1	243417	251837	8420	136	8.61
CM002236.1	254768	267806	13038	120	14.23
CM002236.1	287550	305302	17752	178.5	17.34
CM002236.1	314031	320788	6757	134.5	8.94
CM002236.1	329650	331950	2300	118.5	4.83
CM002236.1	370719	377309	6590	137.5	5.34
CM002236.1	482397	485086	2689	150	4.77
CM002236.1	1282742	1283242	500	184.5	4.07
CM002236.1	6375951	6377116	1165	190	4.84
CM002236.1	6454062	6456389	2327	174	5.65
CM002236.1	9648831	9653457	4626	87	5.97
CM002236.1	9669857	9674964	5107	192.5	5.05
CM002236.1	9680254	9683517	3263	177.5	5.37
CM002236.1	9686288	9694175	7887	139	9.37
CM002236.1	9694997	9698905	3908	134	6.14
CM002236.1	9699714	9702515	2801	201	4.97
CM002236.1	9757142	9764266	7124	175	12.98
CM002236.1	9767686	9798873	31187	167.5	15.84
CM002237.1	155	22882	22727	912	20.89
CM002237.1	25875	29570	3695	181	8.17
CM002237.1	31192	37958	6766	169.5	10.96
CM002237.1	39100	42777	3677	206	5.45
CM002237.1	50185	57402	7217	186.5	9.04
CM002237.1	68681	79107	10426	121	9.31
CM002237.1	104846	109317	4471	131.5	10.04
CM002237.1	146777	151572	4795	230	7.14
CM002237.1	418554	419054	500	128	4.07
CM002237.1	559171	562079	2908	135	5.25
CM002237.1	562593	571984	9391	169	6.96
CM002237.1	582215	582944	729	126	4.03
CM002237.1	584279	587206	2927	124	4.32
CM002237.1	1676057	1689529	13472	217	8.04
CM002237.1	1705546	1708195	2649	197	5.06
CM002237.1	1734184	1738685	4501	195	7.04
CM002237.1	3791796	3792296	500	214.5	4.13
CM002237.1	3887701	3888334	633	99	4.19
CM002237.1	4045874	4046374	500	167.5	4.02
CM002237.1	4158844	4168709	9865	230.5	6.77
CM002237.1	4298364	4299528	1164	125.5	4.39
CM002237.1	4434746	4439269	4523	124.5	5.9
CM002237.1	4445832	4454717	8885	284.5	10.1
CM002237.1	4461198	4478666	17468	137	20.92
CM002238.1	151	16465	16314	2099	20.81
CM002238.1	22843	34542	11699	149.5	9.11
CM002238.1	88310	91509	3199	122.5	5.48
CM002238.1	156566	168856	12290	194.5	8.66
CM002238.1	174434	174934	500	87.5	4.04
CM002238.1	178952	180369	1417	89	4.89
CM002238.1	196372	202227	5855	84.5	9.75
CM002238.1	216006	252803	36797	125	16.82
CM002238.1	253381	254711	1330	99.5	4.06
CM002238.1	260892	276011	15119	168.5	16.3
CM002238.1	276958	302549	25591	216	15.9
CM002238.1	326277	329488	3211	139.5	8.14
CM002238.1	340861	347812	6951	201	9.56
CM002238.1	379925	401540	21615	194.5	15.95
CM002238.1	402873	404050	1177	129	4.71
CM002238.1	413411	417406	3995	213	9.53
CM002238.1	424298	431260	6962	130	9.27
CM002238.1	448075	462488	14413	215.5	10.5
CM002238.1	555440	560087	4647	139.5	7.22
CM002238.1	573080	576345	3265	145.5	4.41
CM002238.1	1337716	1339966	2250	171	5.1
CM002238.1	4468426	4468926	500	126	4.22
CM002238.1	4515426	4516725	1299	169.5	4.45
CM002238.1	4534783	4537369	2586	147	5.2
CM002238.1	4560452	4561950	1498	94.5	4.09
CM002238.1	4571304	4579286	7982	161.5	9.14
CM002238.1	4596607	4597793	1186	195.5	4.49
CM002238.1	4598329	4598829	500	126	4.17
CM002238.1	4626171	4663156	36985	107	14.78
CM002238.1	4672167	4687332	15165	81	16.87
CM002238.1	4688566	4695605	7039	91.5	9.85
CM002238.1	4711675	4712175	500	126.5	4
CM002238.1	4722034	4830143	108109	164.5	19.88
CM002238.1	4856115	4880304	24189	241	13.71
CM002238.1	4926647	4932113	5466	115	6.18
CM002238.1	4960891	4962603	1712	289	4.91
CM002238.1	4964849	4966046	1197	97.5	5.81
CM002238.1	4966595	4972573	5978	127	6.72
CM002238.1	4975201	4985386	10185	149	6.95
CM002238.1	4986245	4987277	1032	152.5	4.67
CM002238.1	4987893	5001274	13381	184.5	11.94
CM002238.1	5012157	5033498	21341	117	14.76
CM002238.1	5053753	5063950	10197	157.5	10.19
CM002238.1	5088417	5099642	11225	207.5	16.69
CM002238.1	5115454	5120183	4729	79.5	6.36
CM002238.1	5127736	5133106	5370	110	6.32
CM002238.1	5143657	5146833	3176	151.5	5.78
CM002238.1	5203772	5207148	3376	176.5	4.66
CM002238.1	5218999	5222012	3013	171	6.83
CM002238.1	5224351	5231242	6891	152	11.02
CM002238.1	5231748	5233766	2018	171	5.21
CM002238.1	5242499	5274787	32288	100.5	17.93
CM002239.1	188	31370	31182	873.5	16.13
CM002239.1	32096	34619	2523	203	5.24
CM002239.1	54154	57469	3315	73.5	7.66
CM002239.1	66630	74072	7442	144.5	7.89
CM002239.1	99867	106620	6753	92	10.25
CM002239.1	107668	115204	7536	142	14.08
CM002239.1	139957	144150	4193	208.5	11.34
CM002239.1	145267	147575	2308	127.5	5.38
CM002239.1	170796	171712	916	101	4.06
CM002239.1	173001	211366	38365	106.5	15.17
CM002239.1	217321	220710	3389	75	4.88
CM002239.1	222596	227459	4863	114	10.09
CM002239.1	247664	248164	500	146	4.03
CM002239.1	248668	257078	8410	170	9.94
CM002239.1	274767	280679	5912	203	7.01
CM002239.1	282267	282767	500	79	4.31
CM002239.1	292664	297212	4548	91	7.12
CM002239.1	303966	364959	60993	104	17.54
CM002239.1	372452	400434	27982	218	18.75
CM002239.1	404572	405216	644	72.5	4.06
CM002239.1	405957	415345	9388	196	10.89
CM002239.1	437454	439117	1663	121	4.11
CM002239.1	462320	477658	15338	119.5	10.95
CM002239.1	491503	497227	5724	111	6.6
CM002239.1	502391	514514	12123	109.5	10.96
CM002239.1	517253	519068	1815	174.5	5.14
CM002239.1	543511	569588	26077	108.5	13.58
CM002239.1	577088	599190	22102	180.5	14.33
CM002239.1	604601	608101	3500	170	7.94
CM002239.1	611550	619553	8003	174	10.82
CM002239.1	620066	621580	1514	235	4.95
CM002239.1	622188	623100	912	90	4.39
CM002239.1	630918	632835	1917	96.5	6.11
CM002239.1	634011	665180	31169	125	12.89
CM002239.1	672405	676638	4233	146	7.66
CM002239.1	681263	681763	500	106.5	4.11
CM002239.1	695529	698830	3301	148.5	7.04
CM002239.1	705067	713385	8318	170.5	10.69
CM002239.1	716236	740214	23978	144	14.1
CM002239.1	743024	746786	3762	150	7.57
CM002239.1	758213	766021	7808	119.5	9.73
CM002239.1	772407	773033	626	97	4.26
CM002239.1	788717	789217	500	104	4.17
CM002239.1	798368	801982	3614	167.5	4.24
CM002239.1	835758	836258	500	120	4.02
CM002239.1	5073997	5099526	25529	106	6.57
CM002239.1	5148572	5155247	6675	149	4.88
CM002239.1	5156603	5157370	767	140	4.47
CM002239.1	5203781	5209729	5948	164	5.31
CM002239.1	5249065	5253000	3935	125	6.87
CM002239.1	5333668	5335246	1578	158	4.07
CM002239.1	5811271	5811934	663	113.5	4.17
CM002239.1	5818697	5823193	4496	121.5	4.57
CM002239.1	5829208	5835800	6592	110	5.93
CM002239.1	5846329	5855267	8938	88	12.44
CM002239.1	5862566	5872914	10348	175	11.74
CM002239.1	5877049	5892669	15620	186	11.29
CM002239.1	5902527	5906558	4031	108	4.69
CM002239.1	5912132	5916501	4369	116	7.39
CM002239.1	5927190	5931280	4090	256	9.01
CM002239.1	5936272	5953866	17594	187	12
CM002239.1	5954823	5955323	500	217	4.24
CM002239.1	5957253	5960238	2985	224	4.09
CM002239.1	5962972	5963603	631	148	4
CM002239.1	5964647	5966579	1932	205.5	5.02
CM002239.1	5967792	5968631	839	208	4.21
CM002239.1	5969242	5975699	6457	210	4.86
CM002239.1	5976458	6000746	24288	201.5	12.7
CM002240.1	21464	24028	2564	239	5.91
CM002240.1	77515	87187	9672	164	4.85
CM002240.1	554910	579846	24936	87.5	13.9
CM002240.1	618266	619475	1209	163	4.74
CM002240.1	620144	621028	884	103	4.17
CM002240.1	636232	665742	29510	116	17.67
CM002240.1	674788	676263	1475	184	5.31
CM002240.1	680052	690078	10026	140.5	10.04
CM002240.1	695462	695962	500	124	4.36
CM002240.1	771617	781199	9582	138.5	7.37
CM002240.1	796888	799780	2892	175.5	5.97
CM002240.1	1706691	1707317	626	147	4.22
CM002240.1	5943479	5945563	2084	156	4.42
CM002240.1	5946326	5946826	500	115.5	4.01
CM002240.1	5955687	5956331	644	119	4.17
CM002240.1	5968660	5979543	10883	103	8.58
CM002240.1	6022432	6034915	12483	160.5	13.02
CM002240.1	6035833	6049134	13301	179.5	10.31
CM002240.1	6050935	6055764	4829	188	11.64
CM002240.1	6057208	6068717	11509	177	13.59
CM002240.1	6080524	6090364	9840	182.5	14.09
CM002240.1	6095663	6103079	7416	99	11.93
CM002240.1	6114617	6126032	11415	107.5	15.62
CM002240.1	6151287	6159938	8651	219.5	11.8
CM002240.1	6160556	6161329	773	107	4.15
CM002240.1	6162318	6163910	1592	148	5.3
CM002240.1	6164651	6168458	3807	199.5	6.47
CM002240.1	6171784	6179254	7470	160.5	12.92
CM002240.1	6190179	6204180	14001	207	17.52
CM002240.1	6210134	6244390	34256	133.5	14.73
CM002240.1	6264298	6265705	1407	262.5	5.51
CM002240.1	6378162	6382232	4070	84	5.01
CM002240.1	6382895	6384438	1543	112.5	4.81
CM002240.1	6386341	6389199	2858	255.5	10.43
CM002240.1	6410019	6436232	26213	243	19.84
CM002241.1	104	5616	5512	455.5	15.29
CM002241.1	8633	11977	3344	183	11.55
CM002241.1	15021	22083	7062	124	10.9
CM002241.1	22682	30782	8100	203.5	9.98
CM002241.1	35566	38841	3275	131	6.1
CM002241.1	40106	41523	1417	173.5	4.96
CM002241.1	47186	51901	4715	105	5.79
CM002241.1	64351	66468	2117	199.5	5.24
CM002241.1	83199	85170	1971	138	4.15
CM002241.1	86805	91817	5012	115	4.97
CM002241.1	121731	134210	12479	182.5	7.47
CM002241.1	140856	146144	5288	98	4.65
CM002241.1	151650	167733	16083	207.5	11.64
CM002241.1	180992	215262	34270	173	10.62
CM002241.1	215873	217250	1377	88.5	4.27
CM002241.1	233986	235574	1588	143.5	4.53
CM002241.1	237947	243177	5230	141	5.67
CM002241.1	342093	347336	5243	144	7.84
CM002241.1	348132	362381	14249	91.5	8.52
CM002241.1	389935	396927	6992	216.5	7.51
CM002241.1	408224	424391	16167	90	7.63
CM002241.1	427698	433615	5917	145.5	11.49
CM002241.1	443869	482028	38159	154	15.06
CM002241.1	486379	489963	3584	77	4.8
CM002241.1	533043	534251	1208	184	4.51
CM002241.1	3469790	3474427	4637	153	8.57
CM002241.1	3475869	3478476	2607	177.5	4.3
CM002241.1	3486313	3490133	3820	131	6.45
CM002241.1	3491948	3502838	10890	230	12.05
CM002241.1	3503509	3507631	4122	192	7.12
CM002241.1	3539027	3542462	3435	108	5.06
CM002241.1	3545454	3550063	4609	133	7.68
CM002241.1	3555939	3556619	680	94	4.03
CM002241.1	3646000	3650702	4702	175	7.11
CM002241.1	3669389	3675618	6229	126	8.11
CM002241.1	3702102	3755685	53583	185	15.76
CM002241.1	3757987	3773061	15074	172.5	18.18
CM002241.1	3774128	3782824	8696	135	15.72
CM002241.1	3793213	3810584	17371	189.5	16.23
CM002241.1	3815452	3818120	2668	165.5	6.86
CM002241.1	3825312	3839018	13706	118.5	10.94
CM002241.1	3844790	3845563	773	85	4.07
CM002241.1	3846231	3846858	627	76.5	5.11
CM002241.1	3867804	3872054	4250	106.5	10.44
CM002241.1	3876528	3879376	2848	109.5	5.41
CM002241.1	3886804	3892970	6166	147	7.82
CM002241.1	3893975	3901544	7569	141	8.76
CM002241.1	3918865	3920689	1824	106.5	4.63
CM002241.1	3921887	3926846	4959	134.5	4.83
CM002241.1	4019840	4020860	1020	177.5	4.4
CM002241.1	4053886	4058211	4325	114.5	6.83
CM002241.1	4064806	4066475	1669	160	6.12
CM002241.1	4119044	4120602	1558	155.5	5.02
CM002241.1	4142140	4149903	7763	107.5	6.73
CM002241.1	4153784	4155522	1738	137.5	5.7
CM002241.1	4157535	4171685	14150	157	11.52
CM002241.1	4172453	4178615	6162	248	5.15
CM002241.1	4179351	4181798	2447	199	4.54
CM002241.1	4185017	4186883	1866	227.5	4.55
CM002241.1	4187529	4190274	2745	125	5.43
CM002241.1	4192938	4218336	25398	216.5	10.69
CM002242.1	205	10020	9815	2332	14.86
CM002242.1	12513	13525	1012	136	4.88
CM002242.1	18732	20331	1599	121	4.97
CM002242.1	51140	52553	1413	263	6.21
CM002242.1	96277	99207	2930	113	4.51
CM002242.1	102041	116525	14484	126.5	7.18
CM002242.1	123429	125124	1695	107.5	4.17
CM002242.1	154182	158474	4292	76.5	4.74
CM002242.1	239995	246171	6176	76	6.41
CM002242.1	248446	249330	884	87.5	4.97
CM002242.1	249943	256299	6356	285.5	10.59
CM002242.1	257540	259480	1940	104	6.46
CM002242.1	264541	266018	1477	134	4.68
CM002242.1	305494	308145	2651	272	7.78
CM002242.1	312250	315791	3541	101.5	5.03
CM002242.1	318789	319743	954	110.5	5.31
CM002242.1	370266	373111	2845	83	4.32
CM002242.1	387817	389271	1454	162.5	4.6
CM002242.1	438303	439676	1373	188.5	4.67
CM002242.1	659816	677021	17205	113.5	10.79
CM002242.1	693993	721426	27433	103	13.84
CM002242.1	884183	891828	7645	207	12.71
CM002242.1	908679	931376	22697	209	16.06
CM002242.1	932389	933014	625	107.5	4.23
CM002242.1	941100	948724	7624	85.5	10.59
CM002242.1	1345100	1356192	11092	108.5	9.19
CM002242.1	1586246	1587465	1219	163	4.33
CM002242.1	1591789	1593124	1335	117.5	4.43
CM002242.1	3650748	3654631	3883	90	4.29
CM002242.1	3662874	3664148	1274	126.5	4.05
CM002242.1	3676174	3678075	1901	147.5	4.65
CM002242.1	3762679	3764217	1538	134	4.27
CM002242.1	4106535	4111198	4663	113	6.15
CM002242.1	4165477	4172852	7375	134.5	5.8
CM002242.1	4196401	4203025	6624	133	9.83
CM002242.1	4215564	4218998	3434	185.5	6.25
CM002242.1	4220285	4224168	3883	118.5	6.11
CM002242.1	4231041	4255288	24247	137.5	19.06
KI440765.1	46062	46562	500	132.5	4.05
KI440765.1	54859	55555	696	98.5	4.45
KI440765.1	72584	73568	984	161.5	4.27
KI440765.1	74602	75623	1021	203	4.34
KI440765.1	78718	82038	3320	169	4.32
KI440765.1	83297	90826	7529	223	5.66
KI440766.1	150	30892	30742	1762.5	10.97
KI440766.1	31674	34190	2516	202.5	4.33
KI440766.1	34691	36103	1412	200.5	4.21
KI440766.1	37089	37589	500	169.5	4.19
KI440766.1	43580	45260	1680	193	4.26
KI440766.1	47491	48653	1162	166.5	4.49
KI440766.1	49511	50676	1165	187.5	4.29
KI440766.1	56189	57491	1302	186	4.87
KI440766.1	65043	66215	1172	175	4.3
KI440766.1	66840	68399	1559	294.5	4.42
Total Domains:			325
Largest Domain (bp):			108109
Average Domain Size (bp)			7746.34
Total Genome Coverage (bp):			2517561
Genome Size:			41102378
% Genome Coverage:			0.061251
